# Supplementary material
Source: Springer Nature journal article supplement (https://www.springermedizin.de/resource/supplementary/12885_2013_4240_MOESM1_ESM.pdf/9465868)

# Tumor growth

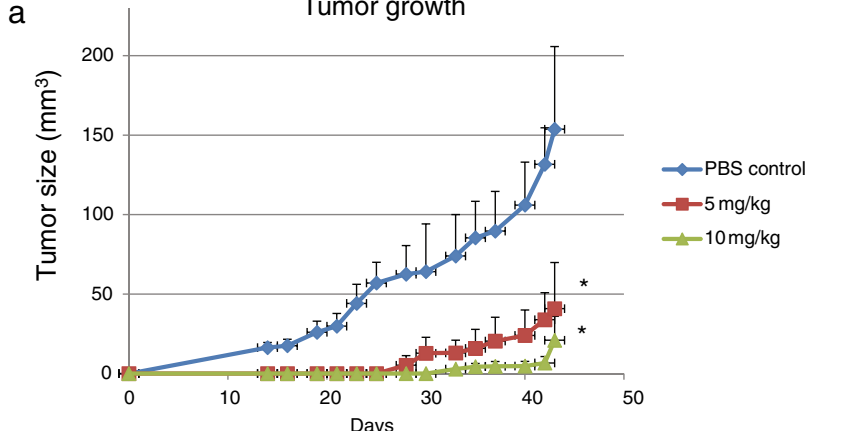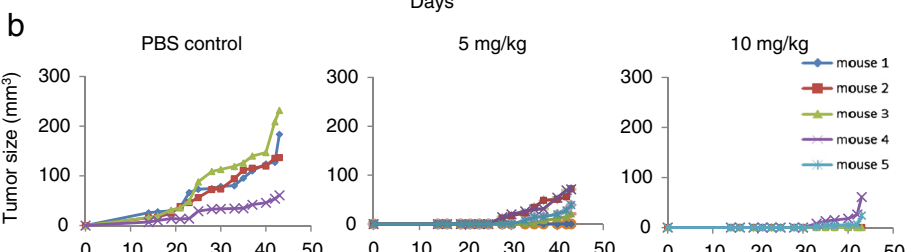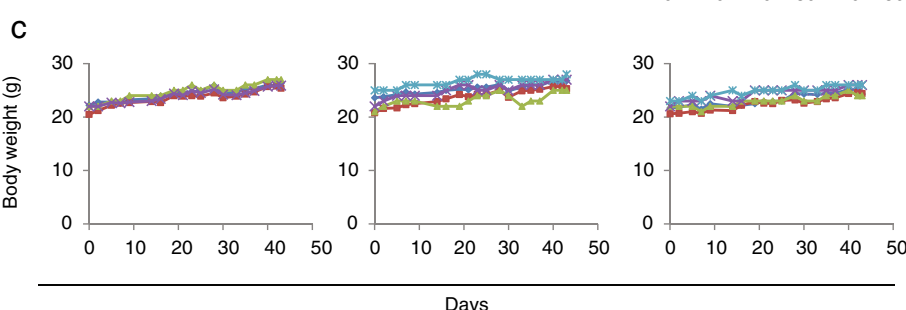

Supplement: MOESM1 [file 9465868]
